# Supplementary material for: Neutralizing gut-derived lipopolysaccharide as a novel therapeutic strategy for severe leptospirosis
Source: eLife. 2024 May 31;13:RP96065. doi: 10.7554/eLife.96065 (PMC11142641; doi:10.7554/eLife.96065)
Supplement: Figure 1—figure supplement 1—source data 1. [file elife-96065-fig1-figsupp1-data1.xlsx]

## Sheet: Sheet1
Supplementary FigA								Supplementary FigB
	colon			ileum						intraperitoneal challenge	subcutaneous challenge
	Mean	SD	N	Mean	SD	N			4	1
0	0	0	0	0	0	0			4	1
6	139	93.8	6	123.6	61.69	3			4	1
48	280.5	112.7	3	612.6	291.4	3			4	1
96	4567	1434	3	3534	305.4	3			4	1
AM	1239688	182347	3	1009056	196125	3			4	1
									4	1
									4	1
									4	1
									4	1
									5	1
									5	1
									5	1
									5	1
									5	1
									8	1
									5		1
									5		1
									5		1
									5		1
									5		1
									5		1
									5		1
									5		1
									6		1
									6		1
									7		1
									8		1
									9		1
									10		1
