# Supplementary material for: Neutralizing gut-derived lipopolysaccharide as a novel therapeutic strategy for severe leptospirosis
Source: eLife. 2024 May 31;13:RP96065. doi: 10.7554/eLife.96065 (PMC11142641; doi:10.7554/eLife.96065)
Supplement: Figure 1—figure supplement 2—source data 1. [file elife-96065-fig1-figsupp2-data1.xlsx]

## Sheet: Sheet1
Supplementary file A				Supplementary file B				Supplementary file C				Supplementary file D				Supplementary file E
	D0	AM			D0	AM			D0	AM			D0	AM			D0	AM
	1.28549	3.36219			0.823397	0.767052			1.2821	1.62626			0.807473	0.654764			0.86712	2.34579
	0.848883	2.18628			0.978728	2.43736			0.715892	0.763389			0.703083	0.377017			0.882469	3.73656
	0.916398	4.71923			1.24088	1.15895			1.08951	0.441638			1.76143	0.389143			1.30684	3.42767
Supplementary file F				Supplementary file G				Supplementary file H
	D0	AM			D0	AM			D0	AM
	1.48611	12.8672			1.13576	8.96857			1.09628	52.2306
	1.50726	11.0593			1.20008	6.35343			0.518468	66.1301
	0.446439	22.1186			0.733676	9.41374			0.414523	73.8652
