# Supplementary material for: Neutralizing gut-derived lipopolysaccharide as a novel therapeutic strategy for severe leptospirosis
Source: eLife. 2024 May 31;13:RP96065. doi: 10.7554/eLife.96065 (PMC11142641; doi:10.7554/eLife.96065)
Supplement: Figure 1—source data 1. [file elife-96065-fig1-data1.xlsx]

## Sheet: Sheet1
Fig1B								Fig1C				Fig1D				Fig1E
	ileum			colon					D0	AM			D0	AM			D0	AM
0	0	0	0	0	0	0			0.2	9			1.70715	27.2304			1.2042	30.8731
6	202.321	239.442	328.708	1594.96	1280.3	1102.91			0.3	8			0.826076	26.5283			0.865605	33.7678
48	163.335	259.388	111.792	21121.3	26759.6	18286.9			0.1	7			0.7091	49.0085			0.95936	20.1786
96	193736	177427		923613	792885	861053			0.3	7
AM	357767	374559	248800	2061864	2530113	2253046
Fig1F				Fig1G				Fig1H				Fig1I
	D0	AM			D0	AM			D0	AM			D0	AM
	0.916913	24.7938			1.12988	0.0126596			0.787135	5.08669			1.19314	2.77865
	1.09476	26.5747			1.70201	0.0181016			0.722371	4.91533			0.829955	2.83602
	0.996213	21.5625			0.520004	0.0150718			1.75869	4.91059			1.00984	3.33262
