# Supplementary material for: Neutralizing gut-derived lipopolysaccharide as a novel therapeutic strategy for severe leptospirosis
Source: eLife. 2024 May 31;13:RP96065. doi: 10.7554/eLife.96065 (PMC11142641; doi:10.7554/eLife.96065)
Supplement: Figure 2—source data 1. [file elife-96065-fig2-data1.xlsx]

## Sheet: Sheet1
Fig2B					Fig2C					Fig2D					Fig2E
	D0	D2	AM			D0	D2	AM			D0	D2	AM			D0	D2	AM
	207	243	287			285.96	441.112	464.165			0.893536	0.856372	0.948849			0.893536	0.856372	0.948849
	205	225	380			306.045	312.201	464.308			0.837207	0.828846	0.960401			0.837207	0.828846	0.960401
	350	144	408			518.573	200.8	535.557			0.975376	0.626626	0.977168			0.975376	0.626626	0.977168
	280	272	217			413.443	422.635	360.9			0.942836	0.789445	0.911524			0.942836	0.789445	0.911524
	214	260	379			264.852	375.715	627.118			0.941116	0.947387	0.973782			0.941116	0.947387	0.973782
	198	267	260			338.091	595.547	319.683			0.86328	0.92727	0.88937			0.86328	0.92727	0.88937
	246	179	290			336.399	218.953	361.343			0.934838	0.883928	0.977481			0.934838	0.883928	0.977481
	252	175	256			391.296	212.517	311.216			0.918849	0.85402	0.947716			0.918849	0.85402	0.947716
	226	164				410.377	274.576				0.891706	0.522895				0.891706	0.522895
	359	200				551.94	343.254				0.959158	0.775069				0.959158	0.775069
Fig2J					Fig2K					Fig2L					Fig2M
	D0	AM				D0	AM				D0	AM				D0	AM
	5.36156	1.36576				0.395257	2.37154				1.63541	0.076852				0.919502	0.276187
	4.32258	1.31473				0.790514	2.96443				1.77528	0.059945				1.07275	0.255978
	0.757196	3.24374				1.3834	4.74308				0.144482	0.315094				0.229033	0.473223
	1.84205	12.6793				1.97629	2.37154				1.04673	0.640947				0.843718	1.39104
	1.95059	1.73482				1.18577	1.62055				1.44789	0.152167				0.321657	0.417649
	7.27108	2.94163				0.316206	3.32016				1.64925	0.849985				0.907713	0.35197
	2.33413	1.53757				1.10672	3.12253				0.41039	0.35352				1.45672	0.304816
	2.46014	2.54741				0.592885	3.00395				0.381187	0.445742				1.79017	0.491748
	3.91486					1.2253					1.14049					1.36915
	3.31271					1.02767					0.36889					1.08959
