# Supplementary material for: Neutralizing gut-derived lipopolysaccharide as a novel therapeutic strategy for severe leptospirosis
Source: eLife. 2024 May 31;13:RP96065. doi: 10.7554/eLife.96065 (PMC11142641; doi:10.7554/eLife.96065)
Supplement: Figure 3—source data 1. [file elife-96065-fig3-data1.xlsx]

## Sheet: Sheet1
Fig3A					Fig3B					Fig3C					Fig3D
	D0	D2	AM			D0	D2	AM			D0	D2	AM			D0	D2	AM
	868.995	771.654	3667.79			0.15729	5.6595	0.533762			0.830971	0.814835	0.013118			0.536189	1.48369	0.046638
	725.54	641.028	3931.47			0.167149	2.12988	0.715659			0.676169	0.957494	0.059271			0.063856	0.327734	0.039614
	1175.67	570.731	5069.83			0.163798	2.12265	0.715659			0.556258	1.04459	0.041465			0.169854	0.310133	0.044201
	610.17	558.942	2284.38			1.73035	0.646829	0.09402			0.699815	0.022829	0.023428			0.904212	0.113647	0.098505
		579.139	2078.95			2.63856	1.90818	0.137917			0.420832	0.02434	0.048151			0.909309	0.231532	0.042358
		2384.93	3078.54			2.76452	1.33406	0.10768			0.971539	0.00871	0.053114			0.452021	0.359705	0.039324
						2.4012	1.59853	0.478483			0.459239	2.78595	0.010325			4.87463	2.38901	0.123137
						2.81313	0.983665	0.589656			0.549742	2.5711	0.007585			3.65521	1.86693	0.16257
						2.72362	1.25396	0.601636			0.595664	3.78931	0.004771			2.92143	2.39549	0.129153
												3.4771	0.09411			2.59767	3.07674	0.078431
												5.32397	0.1514			2.30615	2.6203	0.044338
												3.09279	0.113301				1.68657	0.011819
Fig3E					Fig3F
	D0	D2	AM			D0	D2	AM
	0.761918	462.343	283.775			0.943067	1.36701	0.921246
	0.326369	422.092	310.477			1.00392	1.63444	1.10425
	0.505144	459.272	328.339			0.841632	1.6729	1.1917
	3.19571	186.681	123.034			3.03637	2.81115	1.32316
	2.25423	157.055	101.86			2.55202	2.97184	1.96344
	1.9682	194.335	103.414			3.02113	2.71912	0.878487
	0.647712	12.9684	267.752			1.76495	2.53266	0.056442
	0.839614	13.2523	246.2			1.64609	1.86606	0.029351
	1.03246	9.29965	270.899			1.72595	2.35624	0.035016
		5.806	230.634
		8.22881	162.212
		5.07699	155.658
