# Supplementary material for: Neutralizing gut-derived lipopolysaccharide as a novel therapeutic strategy for severe leptospirosis
Source: eLife. 2024 May 31;13:RP96065. doi: 10.7554/eLife.96065 (PMC11142641; doi:10.7554/eLife.96065)
Supplement: Figure 4—source data 1. [file elife-96065-fig4-data1.xlsx]

## Sheet: Sheet1
Fig4B
	D0	D2	AM
	0	8	100
	1	12	86
	0	14	78
	0	9	140
	1	20	124
	0	16	80
