# Supplementary material for: Neutralizing gut-derived lipopolysaccharide as a novel therapeutic strategy for severe leptospirosis
Source: eLife. 2024 May 31;13:RP96065. doi: 10.7554/eLife.96065 (PMC11142641; doi:10.7554/eLife.96065)
Supplement: Figure 5—source data 1. [file elife-96065-fig5-data1.xlsx]

## Sheet: Sheet1
Fig5B					Fig5C					Fig5D					Fig5E					Fig5G
	Con	Abx	FMT			Con	Abx	FMT			Con	Abx	FMT			Con	Abx	FMT			Bacteroidota			Fimicutes			Proteobacteria
	520	62	89			534.615	67	375			0.973871	0.718423	0.779575			6.61425	2.70163	6.04757			Con	Abx	FMT	Con	Abx	FMT	Con	Abx	FMT
	441	59	356			487.75	64	377.667			0.977399	0.70617	0.959177			6.53104	2.51641	6.24477			59.4931	0.02997	0.064222	31.8156	52.1525	43.2599	0.049237	47.7897	56.5667
	503	57	352			552.583	58	322.1			0.818936	0.879336	0.973297			5.04697	3.69649	5.95474			72.5622	0.019267	60.4949	25.5924	52.8482	38.1842	0.012844	47.1175	0.002141
	394	51	313			444.75	61.5	104.167			0.975008	0.69386	0.970198			6.39994	2.36794	2.95109			31.2268	0	58.4077	22.2529	22.9165	21.1911	0.032111	77.0385	0.008563
																					66.4376	0.002141	63.6525	31.6229	41.1663	32.7489	0.002141	58.8295	0.008563
Fig5I					Fig5J					Fig5K
	Con	Abx	FMT			Con	Abx	FMT		Abx	_	plus	_	_	plus	plus
0	100					3260.77	6.77878e+06	28812.4		FMT	_	_	plus	_	_	plus
1	100					2827.42	8.05612e+06	15662		Lep	_	_	_	plus	plus	plus
2	100					3502.59	7.47465e+06	22654.3			0.9	3.6	2.2	10.9	40.6	28.1
3	100					3033.86	10627494	50765			2.1	4.2	1.8	12.4	58	18
4	100					7102.95	12973732	12104			2.6	4.8	2.8	18.6	44.8	25
5	100					6926.8	18757515	50765			0.3	2.4	1.6	16.4	38.4	19.4
6	87.5										0.4	2.8	3.3	12	60.2	22
7	50
8	12.5									Fig5L
9	0									Abx	_	plus	_	_	plus	plus
0		100								FMT	_	_	plus	_	_	plus
1		100								Lep	_	_	_	plus	plus	plus
2		100									1.1	2.8	1.9	12.5	22	13.6
3		100									1	3.6	2.2	8.4	18.6	12.4
4		100									1	4.4	1.4	6.8	16.4	10.9
5		62.5									0.8	1.8	1.6	7.3	14.8	8.4
6		12.5									0.9	2.1	1.4	7.8	14.6	8.6
7		0
0			100							Fig5M
1			100							Abx	_	plus	_	_	plus	plus
2			100							FMT	_	_	plus	_	_	plus
3			100							Lep	_	_	_	plus	plus	plus
4			100								1.2	1.5	1.2	30.6	36.6	38.4
5			87.5								0.8	0.8	0.8	36	40	34.1
6			62.5								1	2.2	1.9	45	42.9	42.1
7			0								0.9	1.7	1.1	38.4	47.2	46.9
											0.9	0.9	1.3	48.1	52.6	39.5
