# Supplementary material for: Neutralizing gut-derived lipopolysaccharide as a novel therapeutic strategy for severe leptospirosis
Source: eLife. 2024 May 31;13:RP96065. doi: 10.7554/eLife.96065 (PMC11142641; doi:10.7554/eLife.96065)
Supplement: Figure 6—figure supplement 1—source data 1. [file elife-96065-fig6-figsupp1-data1.xlsx]

## Sheet: Sheet1
Supplementary file 6B
	untreated	AM	Abx	Abx+AM	1 EU/ml E. coil LPS	10 EU/ml E. coil LPS
	5.49326	24.8263	5.59968	6.0963	1.2	9.8
	11.1335	26.7064	2.01686	9.21797	1.1	10.8
	5.10305	24.6489	3.40032	18.6184	0.95	9.6
	6.80577	26.1033	6.45104	4.46453	0.96	11
	5.77704	24.3	3.32938	16.8802
	5.13852		5.88346	10.3886
