# Supplementary material for: Neutralizing gut-derived lipopolysaccharide as a novel therapeutic strategy for severe leptospirosis
Source: eLife. 2024 May 31;13:RP96065. doi: 10.7554/eLife.96065 (PMC11142641; doi:10.7554/eLife.96065)
Supplement: Figure 6—figure supplement 2—source data 1. [file elife-96065-fig6-figsupp2-data1.xlsx]

## Sheet: Sheet1
Supplementary file 7B
			Dox												PMB
	EMJH	Lep	32	16	8	4	2	1	0.5	0.25	0.125	0.0625	0.03125	0.0156	32	16	8	4	2	1	0.5	0.25	0.125	0.0625	0.03125	0.0156
	0	58.6	0	0	0	0	5.5	6.2	8	8.6	8.8	20	54	57	0	0	0	0	48	54	58	55	58	57	61	58
	0	65.6	0	0	0	0	6	6	8.4	8.4	8.2	18	58	55	0	0	0	0	52	55	54	59	55	59	57	54
	0	55	0	0	0	0	5.8	6.5	8.2	8.2	8.3	16	55	59	0	0	0	0	54	50	56	50	54	54	56	57
