# Supplementary material for: Neutralizing gut-derived lipopolysaccharide as a novel therapeutic strategy for severe leptospirosis
Source: eLife. 2024 May 31;13:RP96065. doi: 10.7554/eLife.96065 (PMC11142641; doi:10.7554/eLife.96065)
Supplement: Figure 6—source data 1. [file elife-96065-fig6-data1.xlsx]

## Sheet: Sheet1
Fig6B							Fig6C							Fig6D							Fig6E
	untreated	5% FFU	5% FFA	20% FFU	20% FFA			untreated	5% FFU	5% FFA	20% FFU	20% FFA			untreated	5% FFU	5% FFA	20% FFU	20% FFA			untreated	5% FFU	5% FFA	20% FFU	20% FFA
	0.52872	0.94482	33.1273	1.01146	468.735			1.0386	339.619	721.349	402.815	545.358			0.97131	45.4213	71.6804	43.5647	68.0521			0.47995	6.64465	1.39524	3.28167	5.66432
	0.67159	1.25908	32.4139	1.74402	409.701			1.19751	319.519	693.906	557.638	516.021			1.27531	44.0331	61.056	52.7242	53.0808			1.34284	5.01563	0.89555	4.13136	4.3146
	2.8162	1.45061	32.1298	1.27869	447.088			0.80401	409.848	824.797	459.946	755.955			0.80727	44.9273	79.9751	51.616	75.4051			1.55156	5.78866	2.49723	3.24409	2.6128
Fig6F							Fig6G							Fig6H							Fig6I
	untreated	5% SU	5% SA	20% SU	20% SA			untreated	5% SU	5% SA	20% SU	20% SA			untreated	5% SU	5% SA	20% SU	20% SA			untreated	5% SU	5% SA	20% SU	20% SA
	0.52872	2.03	0.161683	13.34	3.58199			1.03861	1.32235	5.84321	7.05581	10.7494			0.971311	0.35437	3.77648	0.444577	17.4897			0.479956	0.48	13.6389	0.05	13.3659
	0.6716	1.48	0.376319	12.95	3.43539			1.19752	1.73141	5.98545	6.65817	12.5197			1.27531	0.319538	3.40351	0.497827	18.9778			1.34285	0.5	18.3701	0.05	17.7766
	2.8162	1.61	0.482548	16.74	3.39519			0.804017	1.48304	7.18606	7.76192	14.3722			0.80728	0.290083	5.08303	0.424552	22.8219			1.55157	0.82	27.4593	0.06	29.3855
Fig6J							Fig6K							Fig6L							Fig6M
	PMB	_	plus	_	plus			PMB	_	plus	_	plus			PMB	_	plus	_	plus			PMB	_	plus	_	plus
	FFA	_	_	plus	plus			FFA	_	_	plus	plus			FFA	_	_	plus	plus			FFA	_	_	plus	plus
		0.52872	4.79149	287.99	69.8236				1.00615	9.26087	485.381	241.739				0.856495	2.11387	260.991	84.5177				0.479956	1.23	8.42	2.45
		0.6716	5.5875	221.238	94.6556				1.13572	6.08313	525.677	258.749				1.02949	2.42298	194.497	84.7882				1.34285	1.48	6.783	3.76
		2.8162	1.92632	233.158	59.4097				0.875121	4.41249	468.577	269.515				1.1341	1.96688	233.075	65.0541				1.55157	1.89	7.89	4.17
Fig6N							Fig6O							Fig6P							Fig6Q
	PMB	_	plus	_	plus			PMB	_	plus	_	plus			PMB	_	plus	_	plus			PMB	_	plus	_	plus
	SA	_	_	plus	plus			SA	_	_	plus	plus			SA	_	_	plus	plus			SA	_	_	plus	plus
		0.971993	2.92296	12.1937	5.31469				0.901625	2.35647	28.164	12.9967				1.07863	2.94174	67.2578	25.836				0.479956	1.2236	8.9546	2.35699
		1.02266	1.63134	14.5221	5.32101				1.12698	2.89563	34.8685	16.7102				1.14708	1.74234	78.1409	26.1025				1.34285	1.3655	5.88887	2.89263
		1.00601	1.44965	12.0096	5.90368				0.984138	1.73256	22.8439	18.1518				0.808226	3.51961	87.801	31.0424				1.55157	1.35995	5.77875	3.45217
