# Supplementary material for: Neutralizing gut-derived lipopolysaccharide as a novel therapeutic strategy for severe leptospirosis
Source: eLife. 2024 May 31;13:RP96065. doi: 10.7554/eLife.96065 (PMC11142641; doi:10.7554/eLife.96065)
Supplement: Figure 7—figure supplement 1—source data 1. [file elife-96065-fig7-figsupp1-data1.xlsx]

## Sheet: Sheet1
Supplementary file 8B
		Saline	PMB	Ab	Dox	PMB + AB	PMB + Dox
	0	100
	1	100
	2	100
	3	100
	4	87.5
	5	37.5
	6	0
	0		100
	1		100
	2		100
	3		100
	4		100
	5		75
	6		50
	7		12.5
	8		0
	0			100
	1			100
	2			100
	3			100
	4			87.5
	5			75
	6			50
	7			25
	8			25
	9			25
	10			25
	11			25
	12			25
	13			25
	14			25
	15			25
	16			25
	17			25
	18			25
	19			25
	20			25
	21			25
	0				100
	1				100
	2				100
	3				100
	4				87.5
	5				62.5
	6				37.5
	7				37.5
	8				25
	9				12.5
	10				12.5
	11				12.5
	12				12.5
	13				12.5
	14				12.5
	15				12.5
	16				12.5
	17				12.5
	18				12.5
	19				12.5
	20				12.5
	21				12.5
	0					100
	1					100
	2					100
	3					100
	4					100
	5					100
	6					75
	7					75
	8					62.5
	9					62.5
	10					50
	11					50
	12					50
	13					50
	14					50
	15					50
	16					50
	17					50
	18					50
	19					50
	20					50
	21					50
	0						100
	1						100
	2						100
	3						100
	4						100
	5						100
	6						87.5
	7						75
	8						75
	9						62.5
	10						62.5
	11						62.5
	12						62.5
	13						50
	14						50
	15						50
	16						50
	17						50
	18						50
	19						50
	20						50
	21						50
