# Supplementary material for: Neutralizing gut-derived lipopolysaccharide as a novel therapeutic strategy for severe leptospirosis
Source: eLife. 2024 May 31;13:RP96065. doi: 10.7554/eLife.96065 (PMC11142641; doi:10.7554/eLife.96065)
Supplement: Figure 7—figure supplement 2—source data 1. [file elife-96065-fig7-figsupp2-data1.xlsx]

## Sheet: Sheet1
Supplementary file 9B
	Saline	PMB	Dox	PMB + Dox
	0	100
	1	100
	2	100
	3	100
	4	62.5
	5	12.5
	6	0
	0		100
	1		100
	2		100
	3		100
	4		75
	5		50
	6		12.5
	7		0
	0			100
	1			100
	2			100
	3			100
	4			75
	5			50
	6			25
	7			25
	8			12.5
	9			12.5
	10			12.5
	11			12.5
	12			12.5
	13			12.5
	14			12.5
	15			12.5
	16			12.5
	17			12.5
	18			12.5
	19			12.5
	20			12.5
	21			12.5
	0				100
	1				100
	2				100
	3				100
	4				87.5
	5				75
	6				62.5
	7				50
	8				50
	9				50
	10				37.5
	11				37.5
	12				37.5
	13				37.5
	14				37.5
	15				37.5
	16				37.5
	17				37.5
	18				37.5
	19				37.5
	20				37.5
	21				37.5
