# Supplementary material for: Neutralizing gut-derived lipopolysaccharide as a novel therapeutic strategy for severe leptospirosis
Source: eLife. 2024 May 31;13:RP96065. doi: 10.7554/eLife.96065 (PMC11142641; doi:10.7554/eLife.96065)
Supplement: Figure 7—source data 1. [file elife-96065-fig7-data1.xlsx]

## Sheet: Sheet1
Fig7B								Fig7C									Fig7D
	Saline	PMB	Ab	Dox	PMB + AB	PMB + Dox			PMB	_	plus	_	_	plus	plus			PMB	_	plus	_	_	plus	plus
0	100								Ab	_	_	plus	_	plus	_			Ab	_	_	plus	_	plus	_
1	100								Dox	_	_	_	plus	_	plus			Dox	_	_	_	plus	_	plus
2	100									4.66508e+06	1.1434e+06	968.136	284.002	443.685	300.137				42.5	38.6	28.6	66.8	25.6	25.4
3	83.3									7.841e+06	9.67991e+06	658.221	350.724	321.527	240.905				48.9	40.8	34.8	48.2	18.5	22.8
4	66.7									2.59358e+06	3.66452e+06	812.665	128.213	177.381	391.172				38.2	36.2	35.9	54.9	20.4	30.2
5	33.3									770323	881690	1206.61	259.313	1324.26	336.485				55.4	44.8	27.5	88.4	16.8	18.8
6	0									1.28455e+06	789357	2568.45	222.734	237.935	4355.43				60.1	32.1	29.4	47.8	16.2	15
0		100
1		100						Fig7E									Fig7F
2		100							PMB	_	plus	_	_	plus	plus			PMB	_	plus	_	_	plus	plus
3		100							Ab	_	_	plus	_	plus	_			Ab	_	_	plus	_	plus	_
4		83.3							Dox	_	_	_	plus	_	plus			Dox	_	_	_	plus	_	plus
5		66.7								30.5	28.4	25.2	60.4	18.8	15.4			48.8	42.7	28.1	66.4	22.6	18.4
6		33.3								28.8	18.6	22.4	58.4	22.4	12.6			62.4	48.2	34.8	58.4	29.1	24.6
7		33.3								36.1	30.4	19.7	36.8	14.2	18.6			54.6	40.4	40.6	44.6	30.7	32.6
8		0								38.2	22.9	32.4	48.6	20.9	24.6			52.9	38.1	32.9	53.1	35.8	27.5
0			100							34.6	28.2	20.8	52.1	16.3	16.6			46.2	34.8	37.5	59.4	34.2	20.8
1			100
2			100
3			100
4			66.7
5			16.7
6			16.7
7			16.7
8			16.7
9			16.7
10			16.7
11			16.7
12			16.7
13			16.7
14			16.7
15			16.7
16			16.7
17			16.7
18			16.7
19			16.7
20			16.7
21			16.7
0				100
1				100
2				100
3				100
4				50
5				33.3
6				16.7
7				16.7
8				16.7
9				16.7
10				16.7
11				16.7
12				16.7
13				16.7
14				16.7
15				16.7
16				16.7
17				16.7
18				16.7
19				16.7
20				16.7
21				16.7
0					100
1					100
2					100
3					100
4					100
5					83.3
6					66.7
7					66.7
8					50
9					50
10					50
11					50
12					50
13					50
14					50
15					50
16					50
17					50
18					50
19					50
20					50
21					50
0						100
1						100
2						100
3						100
4						83.3
5						83.3
6						66.7
7						66.7
8						66.7
9						66.7
10						66.7
11						66.7
12						66.7
13						66.7
14						66.7
15						66.7
16						66.7
17						66.7
18						66.7
19						66.7
20						66.7
21						66.7
